# Supplementary material for: Bio-power performance enhancement in microbial fuel cell using Ni–ferrite decorated anode
Source: Royal Society of Chemistry journal article supplement (doi:10.1039/c7ra01253e), 2017-01-01
Supplement: c7ra01253e1.pdf [file c7ra01253e1.pdf]

## **Bio-power performance enhancement of microbial fuel cell using Ni-ferrite decorated anode**

Xinhong Peng,<sup>\*a</sup> Xizhang Chu,<sup>a</sup> Shenghui Wang,<sup>a</sup> Ke Shan,<sup>a</sup> Daiwang Song,<sup>a</sup> Ya Zhou<sup>b</sup>

<sup>a</sup> Institute of Seawater Desalination and Multipurpose Utilization, State Oceanic Administration (SOA),  
Tianjin, 300192, P. R. of China

<sup>b</sup> Institute of Chemical Industry, Hebei University of Technology, Tianjin 300130, P. R. of China

### **Corresponding Author:**

Xinhong Peng

Tel: (86)22-87897992

Fax: (86)22-87897993

E-mail: [pxinhong@126.com](mailto:pxinhong@126.com)

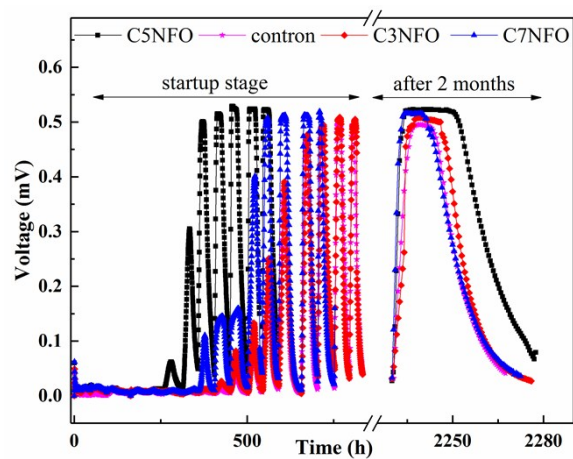

**Fig. S1** Voltage outputs of MFCs with different amount of  $\text{Ni}_2\text{FeO}_4$  after two months operation (1  $\text{k}\Omega$ )

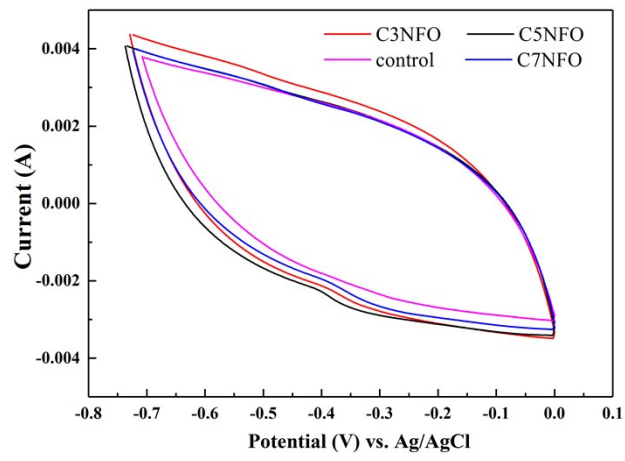

**Fig. S2** Cyclic voltammetry plots of MFCs with different  $\text{NiFe}_2\text{O}_4$  contents
